# Supplementary material
Source: Research Square preprint supplement (doi:10.21203/rs.3.rs-9093887/v1)
Supplement: Supplementary file 1 [file 71277d5fbdcac3bfc78a3cfc.docx]

**Supplementary table S1**.

| Chemical name | Catlog No./Cas No. | Company |
| --- | --- | --- |
| Acid phosphatase (ACP) | 11548 | BioSystem. Barcelona, Spain. |
| Alkaline phosphatase (ALP) | AP307 | RandoxTM Laboratories Limited, (Crumlin, UK) |
| Atrazine | NP2908/1912-24-9 | Thermo Fisher Scientific Inc. (Waltham USA) |
| 1Chloro-2,4-dinitrobenzene (CDNB) | A13774-0E/97-00-7 | Thermo Fisher Scientific Inc. (Waltham USA) |
| Copper Sulphate Pentahydrate | 102790/7758-99-8 | Central Drug House (P) Ltd |
| 2’,7’-dichlorodihydrofluorescin diacetate | 15205/4091-99-0 | Sigma-Aldrich Inc. (St Louis, MO, USA) |
| Dipotassium hydrogen phosphate trihydrate | 119754/7758-11-4 | AK Scientific, Union City, USA |
| 5,5’-Dithio-bis-(2-nitrobenzoic acid) Ellman’s or DTNB | Sc-359842/69-78-3 | Santa Cruz Biotechnology. (Finnel street, Dallas) |
| Ethanol (Absolute) | 107017/64-17-5 | EMSURE®, ACS,ISO,Reag. Ph Eur |
| Folin-Ciocalteu’s phenol reagent | 109001/12111-13-6 | J.T Baker (Phillisburg, PH, USA) |
| Follicle-Stimulating Hormone | BXE0631A | Fortress Diagnostics (Antrim, UK) |
| Glucose 6-phosphate dehydrogenase (G6PD) | PD410 | RandoxTM Laboratories Limited, (Crumlin, UK) |
| Glutathione , reduced | Sc-29094/17-18-8 | Santa Cruz Biotechnology. (Finnel street, Dallas). |
| Hydrochloric Acid | 109057/7647-01-0 | Sigma-Aldrich Inc. (St Louis, MO, USA) |
| Hydrogen peroxide (H2O2) | 107209/7722-84-1 | Sigma-Aldrich Inc. (St Louis, MO, USA) |
| Lactate dehydrogenase (LDH) | LD401 | RandoxTM Laboratories Limited, (Crumlin, UK) |
| L-Adrenaline (Epinephrine) | L04911-14/51-43-4 | Sigma-Aldrich Inc. (St Louis, MO, USA) |
| Luteinizing Hormone (LH) | BXE0651A | Fortress Diagnostics (Antrim, UK) |
| Manganese (II) Chloride | 805930/7773-01-5 | Sigma-Aldrich Inc. (St Louis, MO, USA) |
| Mono-potassium orthophosphate | 104873/7778-77-0 | AK Scientific, Union City, USA |
| N-(1-naphthyl) ethylenediamine dihydrochloride (Griess reagent) | 109023/1465-25 | AK Scientific, Union City, USA |
| O-Dianisidine | Sc-215608/119-90-4 | Sigma-Aldrich Inc. (St Louis, MO, USA) |
| Phosphoric acid | 100573/7664-38-2 | Fortress Diagnostics (Antrim, UK) |
| Potassium Chloride | 104936/7447-40-7 | Sigma-Aldrich Inc. (St Louis, MO, USA) |
| Progesterone (17-α-OH progesterone) | BXE0661A | Fortress Diagnostics (Antrim, UK) |
| Prolactin | BXE0671A | Fortress Diagnostics (Antrim, UK) |
| Reduced glutathione (GSH) | sc-2909470-18-8 | Sigma-Aldrich Inc. (St Louis, MO, USA) |
| Sodium Azide | 822335/26628-22-8 | Sigma-Aldrich Inc. (St Louis, MO, USA), Reagent Plus® |
| Sodium Carbonate (Na2CO3) | 106392/497-19-8 | LOBA CHEMICAL, Mumbai, India |
| Sodium Hydroxide | 106462/1310-73-2 | MOLYCHEM MUMBAI, India |
| Sodium-Potassium tartrate | Sc-203364/6381-59-5 | Sigma-Aldrich Inc. (St Louis, MO, USA) |
| Sulfanilamide | 111799/63-74-1 | AK Scientific, Union City, USA |
| Sulphosalicylic acid | S1710/5965-83-3 | Sigma-Aldrich Inc. (St Louis, MO, USA) |
| Testosterone | BXE0862A | Fortress Diagnostics (Antrim, UK) |
| Thiobarbituric acid (TBA) | 108180/504-17-6 | Sigma-Aldrich Inc. (St Louis, MO, USA) |
| Trichloroacetic acid | 100807/76-03-9 | Molychem, Mumbai India |
| Tris | J60636K2/77-86-1 | Roche diagnostics. Mannheim, Germany. |
| Tris (hydroxymethyl) aminomethane | 102408/77-86-1 | Sigma-Aldrich Inc. (St Louis, MO, USA) |
| Xanthine | 6820/69-89-6 | Sigma-Aldrich Inc. (St Louis, MO, USA) |
